# Supplementary material
Source: Springer Nature journal article supplement (https://www.springermedizin.de/resource/supplementary/12985_2009_576_MOESM1_ESM.pdf/9608488)
Supplement: MOESM1 [file 9608488]

ANRY8\_COR : SPA-LQTRMFSEKTKWANGLF SKIPGIGPTFADTVSQAMF SVLNLQPKRMMEYRNR  
 Q7VS08\_BOR : GTA-RLPRLFAIKARIDSF CERVPLL PKYLSDRV LQFASRLF PDHLPRRLREYRDA  
 Q4BKK3\_BUR : GTK-RMPMLFGEKSKCDAWFDR LGE LPRHLSDRV MQAVSNLF PNHLPPRIRDYGKR  
 Q5NQX4\_ZYM : GTD-RLPQLFAMKGWFDG LNNRVSEL PRYLSDRV MQFASTLF PHHLPKRMDDFRDR  
 Q6WB82\_ALC : GTA-KVPSAFAMKSRIDGFEFERE G---RGVTD RVIQAVM NRLPSHL PARMRQRDR  
 Q6FFS0\_ACI : GTA-NVPKAFAMKDKIDGVLEK LKI---KGLTDHLLQALTE CLP SHLPKRMTEFRDL  
 Q7N371\_PHO : GTD-KMPTYFTLKG RMDAIFNRVPEL PVNLIDRIMQGLSRLLPSHLPKRLKEYRDR  
 Q6D2B5\_ERW : GTD-KLPLFFNLKGVQD TIFSKVPEL PSHLVDRTMQFLGRLLPSHL PARMKTYRNR  
 DLD\_ECOLI/ : GTD-KMPEFFNLKGR TDAMLEKVKV EFRPHETDRAMQKFGHLF PSHLP PARMKNWRDK  
 Q66D31\_YER : GTN-NMPEFFTLK GKIDARLNKI PHLVDH LTRD RVMQGF SQILPNHLPKRLKTYRNQ  
 Q5F898\_NEI : GTH-QLBKLEFDL KARVDRE GKKVSELPKHESDRAMQFVSKFLPDHLPKSMRDYRDK  
 LDHD\_HAEIN : GTH-WLPKLFSLKSNVDRI GKKFEFLPOHLSDKFMQTVSKFIPEHLPQSLWDYRDK  
 Q5FRI2\_GLU : GTK-YLPMFFF SMKSREDFVAORLP ELS DHE SDRAMQFLSRFLPKQLPQRMCDYRDR  
 Q1NHT9\_9SP : GTA-RLPRLFAAKSWVD----NLPCIRPGWSDRMMQRFGRLLPDHLPEMRRFRDR  
 Q2BK95\_9GA : GTD-PLBKLEFAIKGKIAAYLNKISELPKDI PDRVMQFACKLWENIIPKMRDFREK  
 Q1UCB0\_9GA : GTD-TLBRLEFSIKG AIDAKLNKWSMPKHE TDKVMQFIANIFPNHLPKRMTQYRDK  
 Q1YWQ9\_PHO : GTE-SLPKFFALKAKVENFLGRIPYVNKYLPDTILYYVSKLFPQHLPKRMLDFRDK  
 Q1VBS3\_VIB : GTD-KLPKMFALKAKVENFLERIPVSKYLPDTILYYASKLFPQHLPERMLDFRDK  
 Q2VHK1\_9LA : GTG-HLPQMFALKAKVENFLKHIPEFKPYE PDRLLQTL SNLF PNQMPKRLDDYIEK  
 Q7V9S2\_PRO : GTK-YLBPKLEAKRYIDQITGQVTEFLPENISDRLLMQFIADILENHLPIRLLSFRKK  
 GBV\_C\_BAA2 : GTTTWLNRLLTTLERSS-CIPDSYEQQADYCDKISAMLRRLSLTRTVVALVNRPEK  
 GBV\_C\_2210 : GTTTWLNRLLTTLERSS-CIPDSYEQQADYCDKVSATVRRSLTRTVVALVNRPEK  
 GBV\_C\_BAA2 : GTTTWLNRLLTTLERSS-CIPDSYEQQADYCDKVSAMLRRLSLTRTVVALVNRPEK  
 GBV\_C\_VARI : GTTTWLNRLLTTLPPSS-CIPDSYEQQVDYCDKVNATVRRSLTRTVVALVNRPEK  
 GBV\_C\_AAD3 : GATTWLNRLLTTLERSS-VIPDTYPEQEADYCDRVSALLRRLSLTRLIVGAVTHQPR  
 GBV\_A\_T088 : GOD-WVNRLLTLLERSS-VIPDDYEVKDEEVVQVSSILRRMSLSRWVMTLVDKREA  
 GBV\_A\_AAB7 : GHD-WVNRLLTVLERSS-VMPDDEFVKDEYVNRVSSVLRKMSLSRWILT LVDKREA  
 GBV\_A\_AAC4 : GED-WVNRLLTLLERSS-VLPDGEFVKSEETERVSTILRKMMSLSRWVMTLVERREL  
 GBV\_A\_AAC5 : GOD-WVNRLLTMPERSS-VMPDDEFKDEFEVTKVSTVLRKLSRWIMTLVDKREM  
 GBV\_B\_CAC3 : GEDHWLNRLTTLARSNTPVCEYFIATRDIRRKILGLEASTPWSVISA CIRLHHT  
 HCV\_CAA728 : GANQWMNRLIABASRGNHVSPTHYVPETDASKNVITQILTSLTITSLLRRLHQWVNE  
 HCV\_AAP556 : GAVQWMNRLIABASRGNHVAPTHYVAESDASQVMQMLSSLTITSLLRRLHTTWITE  
 HCV\_BAA326 : GATQWMNRLIABASRGNHVSPTHYVPETDTSRQIMTILSSLTITVTSLLRKLHEWINT  
 HCV\_D84263 : GATQWMNRLIABASRGNHVSPTHYVPETDASRAVTILSSLTITVTSLLRRLHEWISG  
 HCV\_AAF599 : GAVQWMNRLIABASRGNHVAPTHYVTESDASQVITQLLGS LTITVTSLLRRLHWNWITE  
 HCV\_AAR224 : GAVQWMNRLIABASRGNHVSPTHYVPESDAAARVTQILSSLTITVTSLLRRLHQWINE  
 HCV\_AAT006 : GAVQWMNRLIABASRGNHVSPTHYVPESDAAARVTQILSSLTITVTSLLRRLHQWINE  
 HCV\_AAT699 : GAVQWMNRLIABASRGNHVSPTHYVPESDASARVTPILTRLTVTQLLKGLHVWISS  
 HCV\_AAV755 : GAAQWMNRLIABASRGNHVSPTHYVPETDASRAVTNILSSLTITVTSLLRKLHQWINE  
 HCV\_BAA083 : GAVQWMNRLIABASRGNHVSPTHYVPESDAAAKVTALLS LTITVTSLLRRLHQWINE  
 HCV\_BAA098 : GAAQWMNRLIABASRGNHVSPTHYVPETDASRAVTNILSSLTITVTSLLRKLHWHWITE  
 HCV\_O39928 : GAVQWMNRLIABASRGNHVSPTHYVPETDASAKVTQILSSLTITVTSLLRKLHTTWIGE  
 HCV\_Y11604 : GAVQWMNRLIABASRGNHVSPTHYVPESDAAARVTILSSLTITVTSLLRRLHKWINE  
 HCV\_ABP888 : GATQWMNRLIABASRGNHVSPTHYVPETDASKNVTILSSLTITVTSLLRKLHEWINS  
 HCV\_VARI1 : GEVHWNRMIABASIGNHDSPRHYVVENDTAVRVT HVL SRLTITHLLKRLHAWIHE  
 HCV\_VARI2 : GTVQWVNRLIANTSRGNHISPAHYVPEGE PALRVTEILENGTITVTSLLRKLHWHWINE  
 HCV\_VARI3 : GAAQWMNRLIABASRGNHVSPTHYVPESDAAARVTIKLPNLTITVTSLLRRLHAWINE  
 HCV\_VARI4 : GAVQWMNRLIABASRGNHVSPTHYVPESDAAAGPVTQILSSLTITVTSLLRRLHQWINE

Lact-deh-mem

Hepaci-virus  
NS4B-CTD
